# Supplementary material
Source: PubMed Central journal article supplement (PMC2657450)
Supplement: 0810280106_0810280106SI.pdf [file 0810280106_0810280106SI.pdf]

# Supporting Information

Holman et al. 10.1073/pnas.0810280106

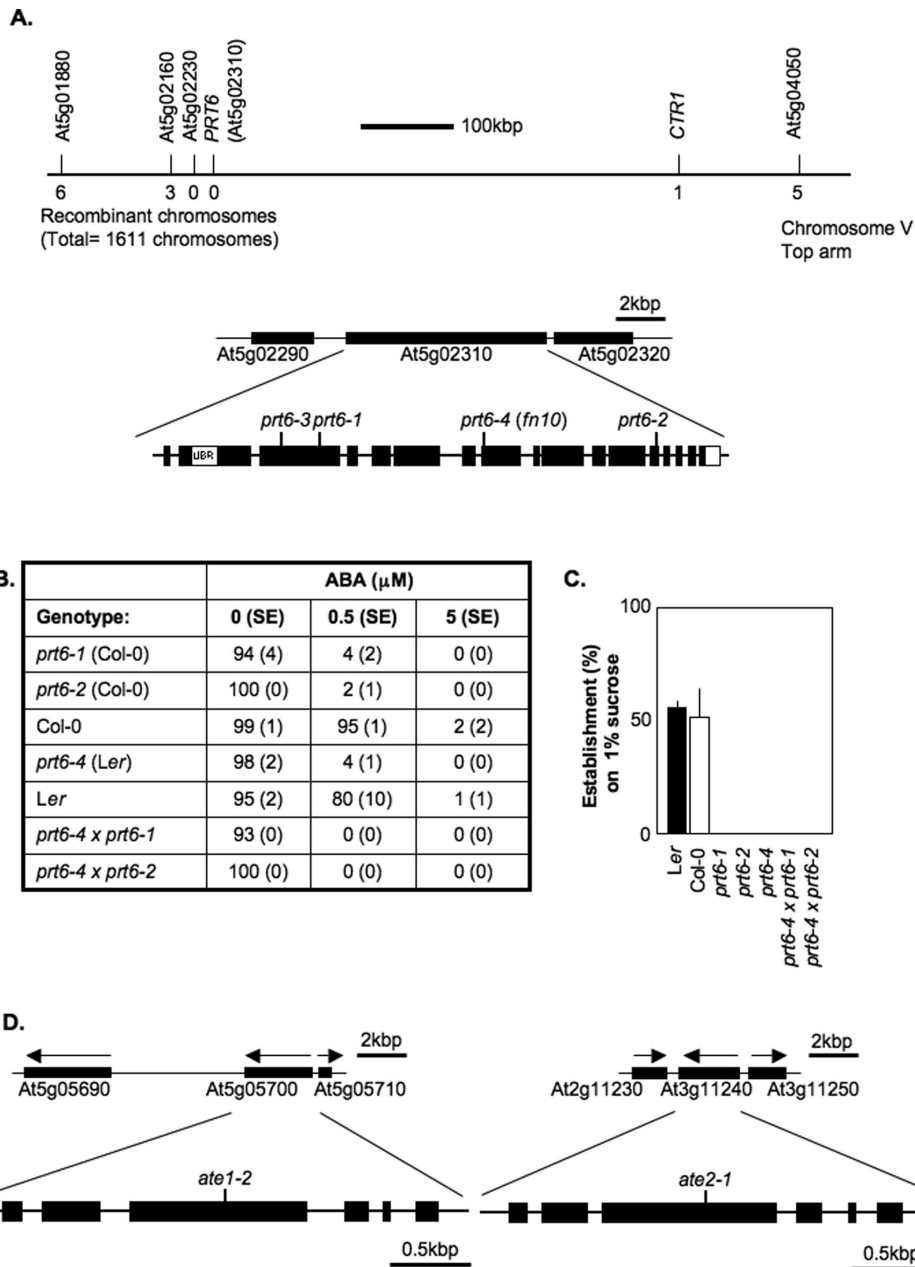

**Fig. S1.** Positional cloning of *prt6-4*. (A) Chromosomal positions of molecular markers used to map the position of the mutation represented by *prt6-4* (originally denoted in our genetics screen as fast neutron line 10; fn10). An F2 population was developed between Ler and Col-0, and it was used to map the position of the mutation. Numbers of recombinant chromosomes in the mapping population are indicated. A diagrammatic representation of the *PRT6* gene (At5g02310) shows the position of the *prt6-4* (*fn10*) mutation, which is an insertion 497,178 kbp from the top of chromosome V into the *PRT6* gene. The positions of other previously identified *prt6* alleles are also shown (all T-DNA insertions). (B and C) Complementation analysis demonstrates that the *prt6-4* (*fn10*) mutation is in the same genetic complementation group as *prt6-1* and *prt6-2*. (B) Reduced ABA sensitivity cannot be restored in crosses between *prt6* alleles. Therefore, increased ABA sensitivity of all mutants is due to disruption of the same gene (*PRT6*). Germination potential of moist, chilled seeds on 1/2MS supplemented with ABA is indicated, following 7 days of imbibition. Data points represent mean values in percent  $\pm$  standard error of the mean (SE). (C) Reduced sugar sensitivity cannot be restored in crosses between *prt6* alleles. Therefore, increased sugar sensitivity of all mutants is due to disruption of the same gene (*PRT6*). Establishment of moist chilled seeds on water-agarose supplemented with 1% (wt/vol) sucrose for 7 days of imbibition following 2 days of moist chilling. Data points represent mean values in percent  $\pm$  standard error of the mean (SE). (D) Positions of TDNA insertions in genes *ATE1* and *ATE2*. *ate1-2* corresponds to SALK\_023492, and *ate2-1* to SALK\_040788.

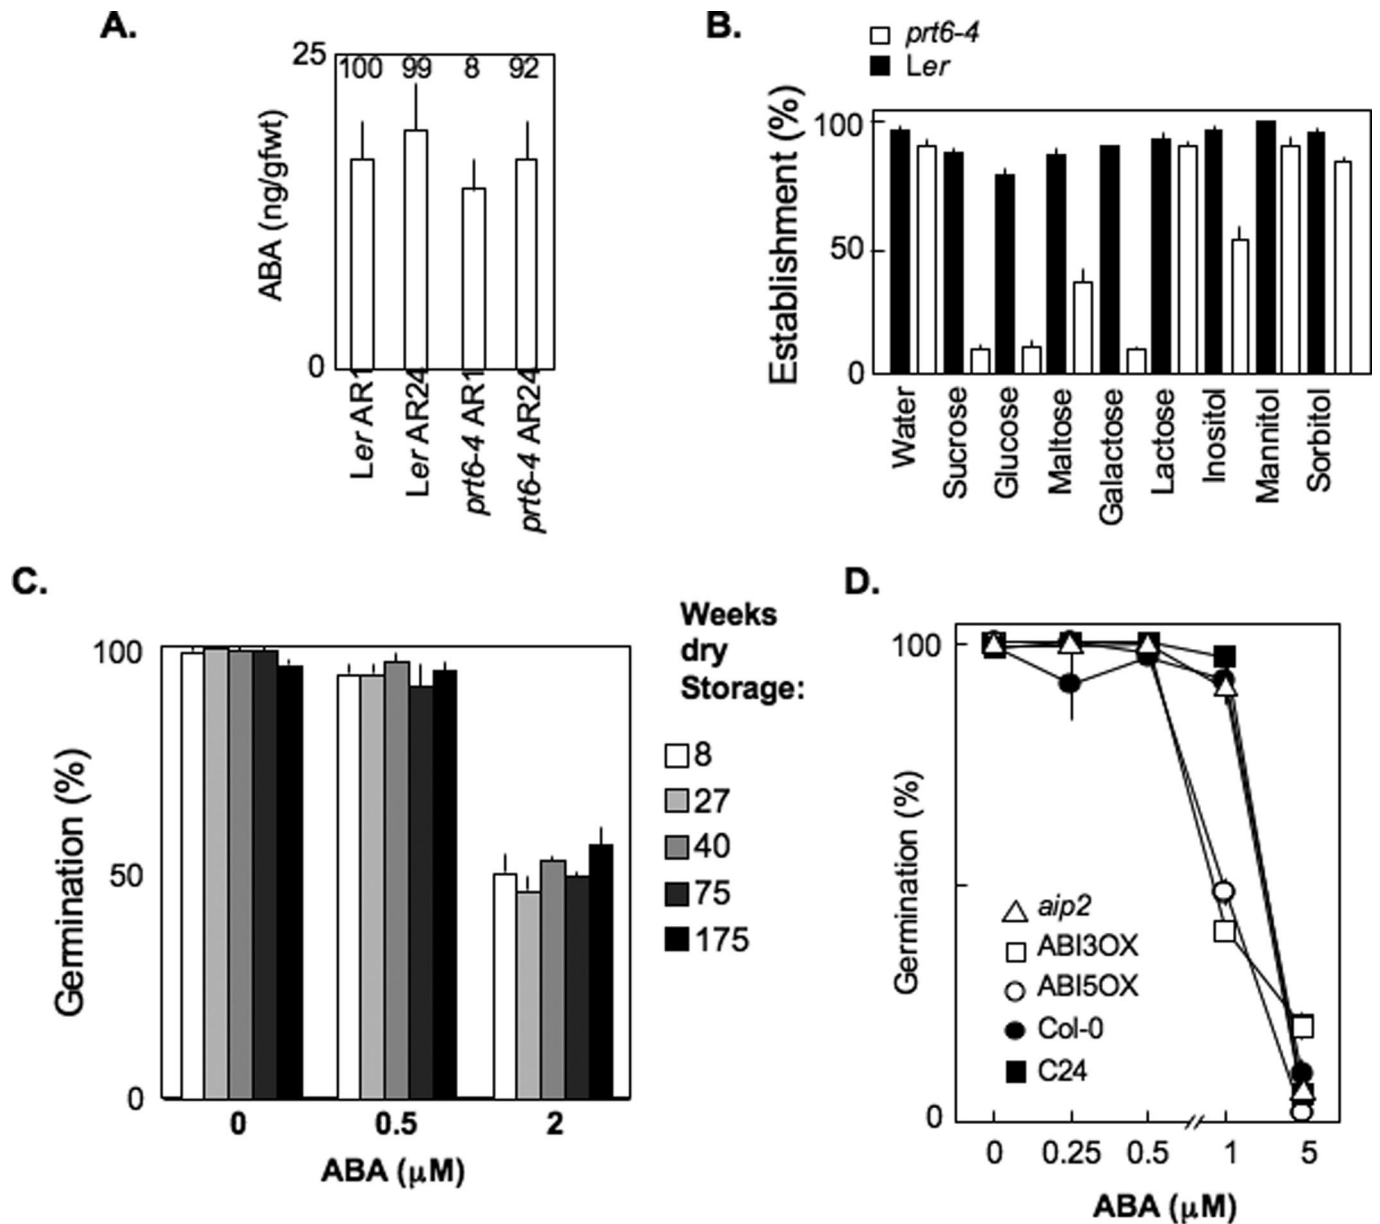

**Fig. S2.** Physiological characteristics of *prt6-4* mutant seeds. (A) Endogenous ABA content of unchilled Ler and *prt6-4* seeds imbibed for 24 h on water-agarose media at 24 °C. Seeds were stored for 1 month (AR1) or 24 months (AR24) before assay. Numbers above bars refer to percentage germination of seed lots. Seed material was harvested for ABA analysis as previously described [Mulholland BJ, et al. (2003) *Environ Exp Bot* 50:17–28]. (B) Establishment of WT (black bars) and *prt6-4* (white bars) after imbibition for 7 days on water-agarose media supplemented with 1% (wt/vol) carbohydrate. (C) ABA sensitivity of endosperm rupture following after-ripening does not change in WT Ler seeds. Seeds were stored for increasing periods of time before assay for germination potential. Assayed on 1/2MS supplemented with ABA on 7 days of imbibition, following 2 days of moist chilling. (D) ABA sensitivity of endosperm rupture of *aip2*, ABI3OX, and ABI5OX and WTs (respectively Col-0, C24, and Col-0). Seeds were assayed as for C. Data points represent mean values  $\pm$  standard error.

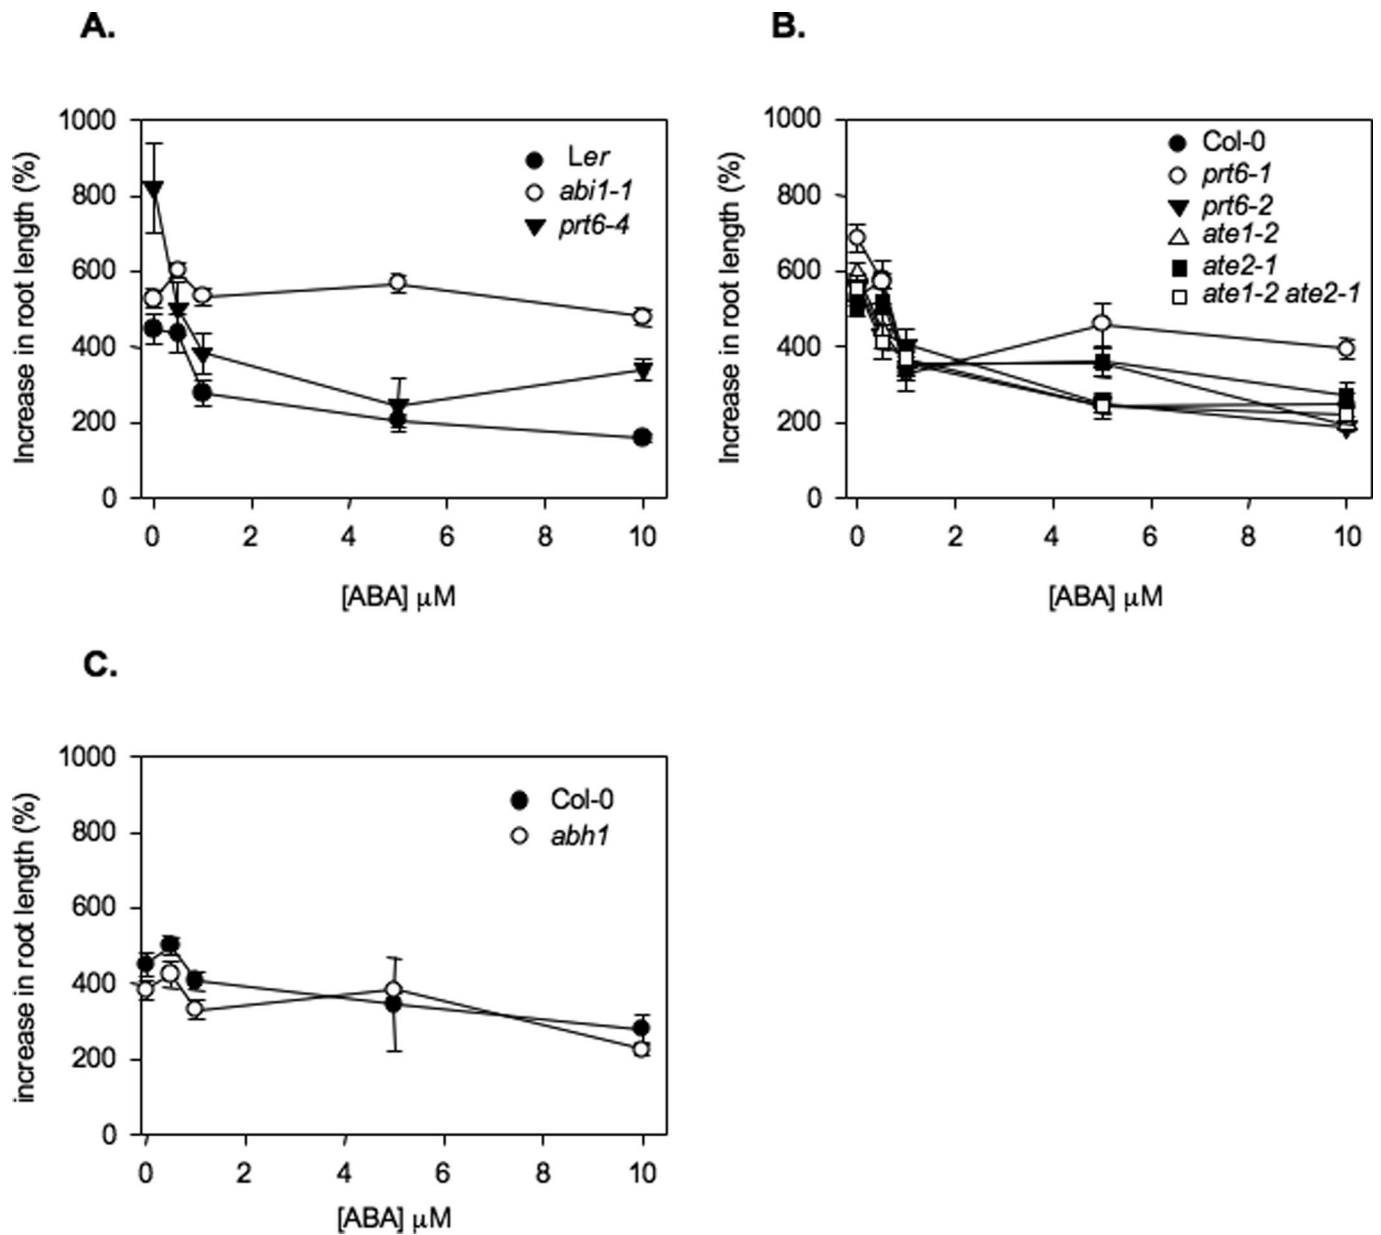

**Fig. S3.** Mutants in the N-end rule pathway are not hypersensitive to ABA for root elongation. Graphs show the percentage increase in root length of seedlings transferred to ABA following 5 days' imbibition on 1/2MS, assayed after incubation on ABA-supplemented media for 6 days. (A) The effect of exogenous ABA on the root elongation of *prt6-4* seedlings was similar to that of *Ler*, with percentage increases in root length reducing with increasing concentrations of ABA. The *abi1-1* mutant seedlings (●) were insensitive to applied ABA. (B) The effect of exogenous ABA on the root elongation of *prt6-1,2*, *ate1-2*, *ate2-1*, and *ate1-2 ate2-1* double-mutant seedlings was similar to that of *Col-0*. (C) The *abh1* mutant and *Col-0* seedlings had a similar level of sensitivity to applied ABA for root elongation. Data points represent mean values  $\pm$  standard error.

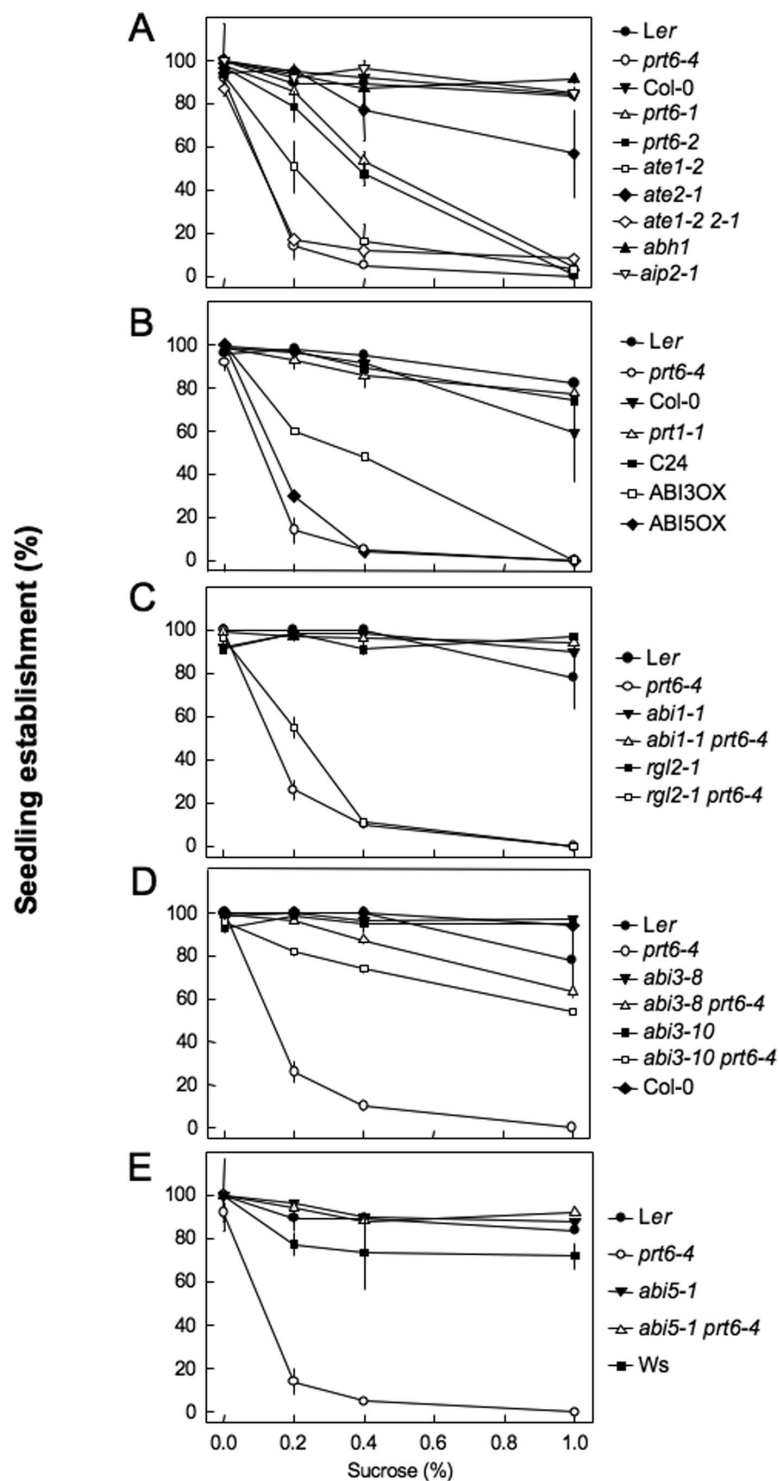

**Fig. S4.** Effect of exogenous sucrose on seedling establishment of single and double mutants. Seeds were plated on water-agarose media containing sucrose, as indicated. Establishment was scored as the presence/absence of green cotyledons after 7 days. Data represent means  $\pm$  SE of the mean. (A) N-end rule pathway mutants (*prt6-4*, Ler background; *prt6-1*, *prt6-2*, *ate1-2*, *ate2-1*; Col-0 background) and the ABA-hypersensitive mutants, *abh1* and *aip2-1* (Col-0). *abh1* and *aip2-1* are insensitive to exogenous sucrose, *ate2-1* shows modest sensitivity, whereas establishment of *prt6-1*, *prt6-2*, *prt6-4*, *ate1-2*, and the *ate1-2 ate2-1* double mutant is sensitive to applied sugar. (B) Seedling establishment of the N-end rule pathway mutant *prt1-1* is insensitive to exogenous sucrose, as are transgenics that express ABI3 and ABI5 under the control of the 35S*CaMV* promoter (*ABI3OX*, Col-0; *ABI5OX*, C24 background, respectively). Ler and *prt6-4* are shown for comparison. (C) Genetic interactions of *prt6-4* with components of ABA synthesis and signaling (*abi1-1*, *aba1-1*; Ler background) and GA signaling (*rgl2*; Ler background). (D) Genetic interactions of *prt6-4* with *ABI3*. *abi3-8* and *abi3-10* alleles are in the Col-0 background. (E) Genetic interactions of *prt6-4* with *ABI5*. *abi5-1* is in the Ws background. *ABI5* is epistatic to *PRT6* in this assay.

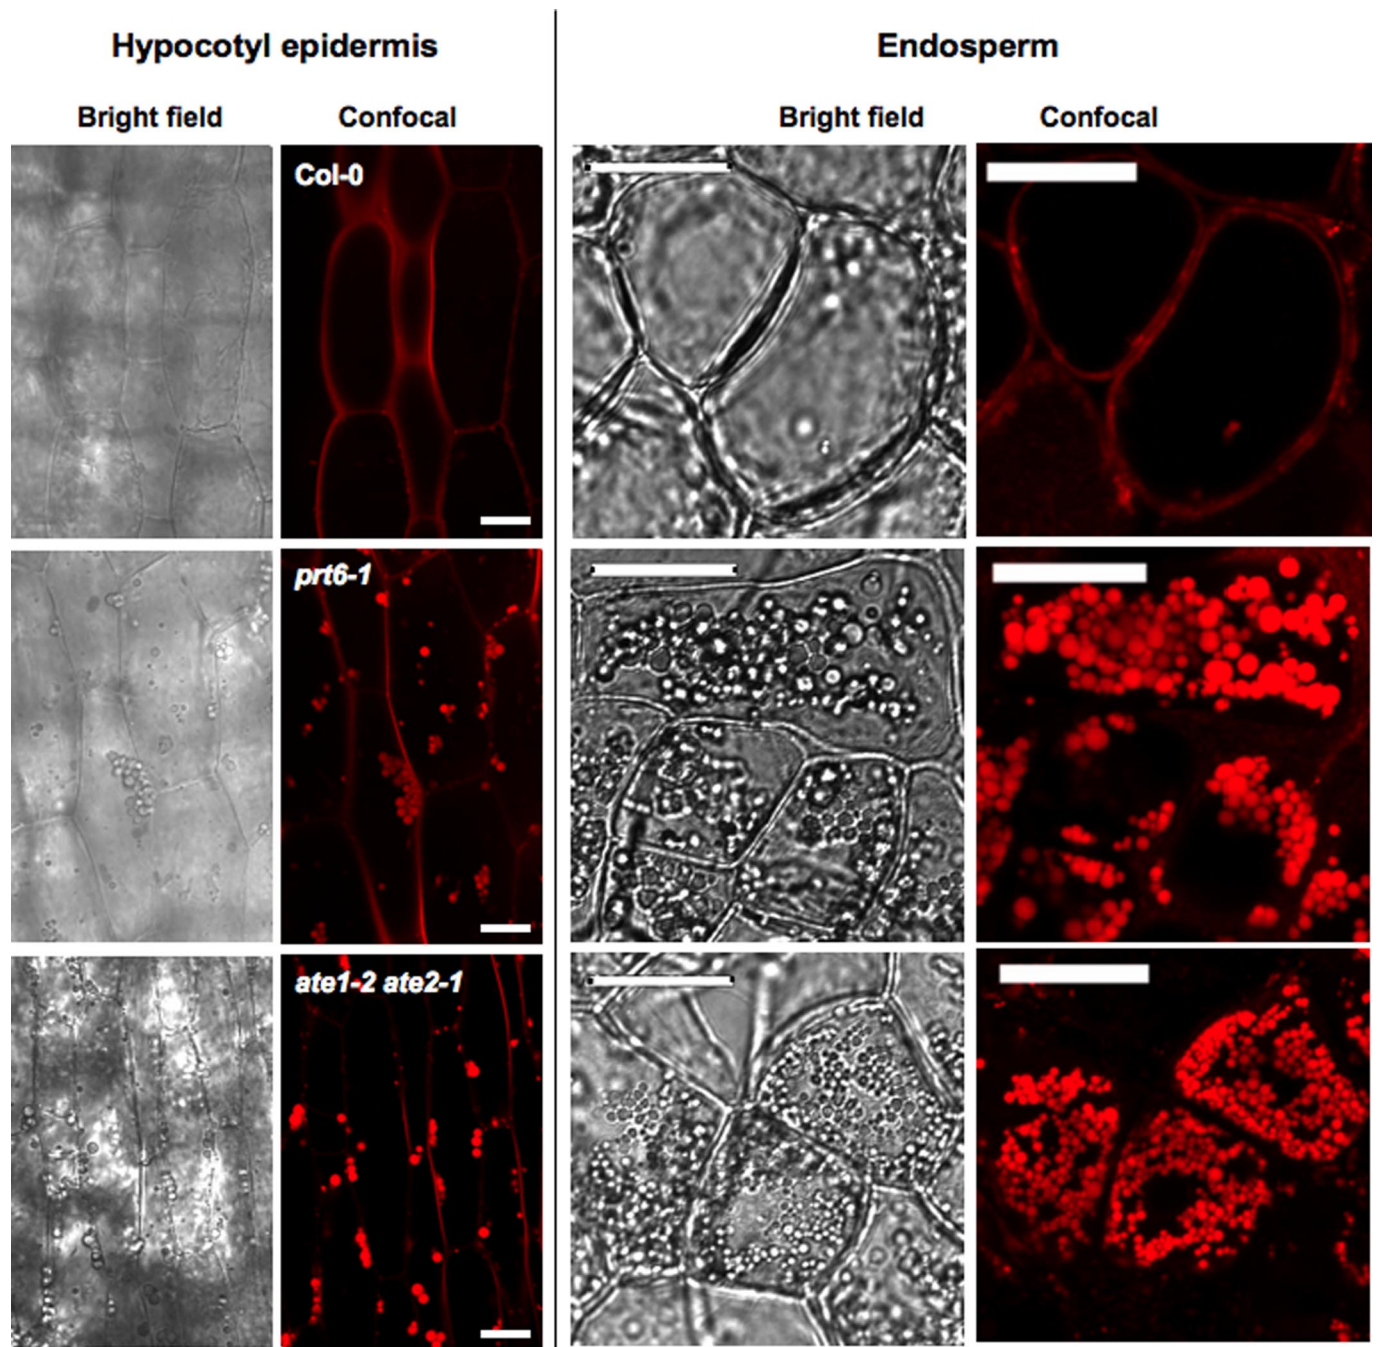

**Fig. S5.** Brightfield and confocal microscopy reveal oil body retention in hypocotyl epidermis and endosperm of N-end rule pathway mutants. In each case, both brightfield and confocal micrographs of Nile Red-stained material is shown. Light-grown seedlings (5 days imbibed, grown on 1/2MS) were treated with the lipophilic dye, Nile Red as previously described [Dietrich D, et al. (2009) *Mol Biol Cell* 20:530–543]. The presence of retained oil bodies is indicated by staining of lipid in localized areas within cells by Nile Red. (Scale bars: 20  $\mu\text{m}$ .)

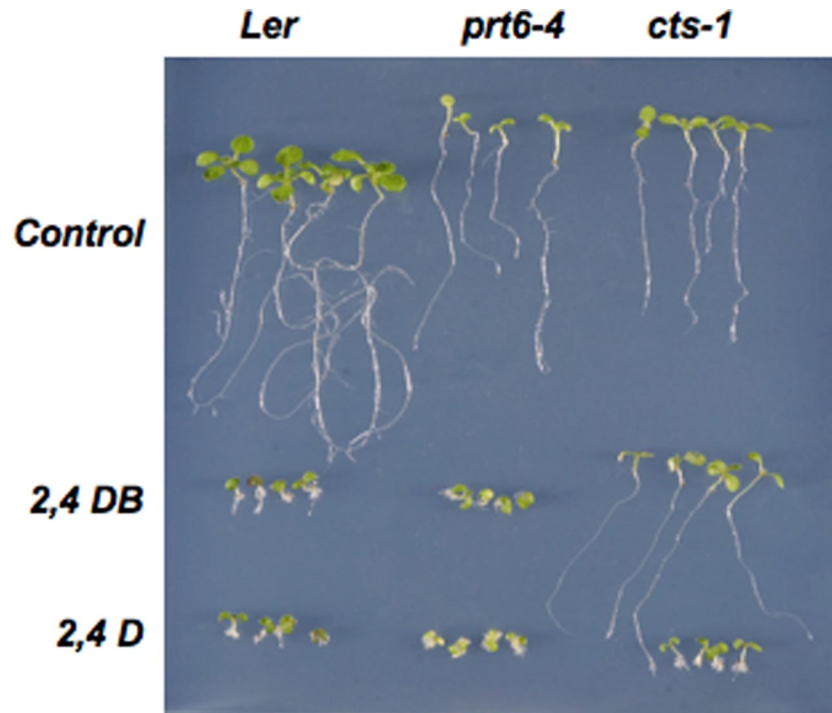

**Fig. S6.** The *prt6-4* mutant is sensitive to 2,4-DB. Seeds of *prt6-4*, *cts-1*, and the respective wild type, *Ler*, were plated on 0.5× MS medium containing 0.5% (wt/vol) sucrose and 0.2 mg/mL 2,4-DB or 0.05 mg/mL 2,4-dichlorophenoxyacetic acid (2,4-D), as indicated. Root growth is inhibited in all 3 genotypes in the presence of 2,4-D. *cts-1*, which is impaired in peroxisomal  $\beta$ -oxidation and unable to convert 2,4-DB to 2,4-D, is able to develop roots and shoots on media supplemented with 2,4-DB. In contrast, the *prt6-4* mutant shows a similar stunted phenotype to the wild type. Seedlings were rearranged on a fresh plate before photographing.
